# Supplementary figures and images for: Salidroside alleviates dextran sulfate sodium-induced colitis in mice by modulating the gut microbiota
Source: Royal Society of Chemistry journal article supplement (doi:10.1039/d3fo01929b), 2023-01-01

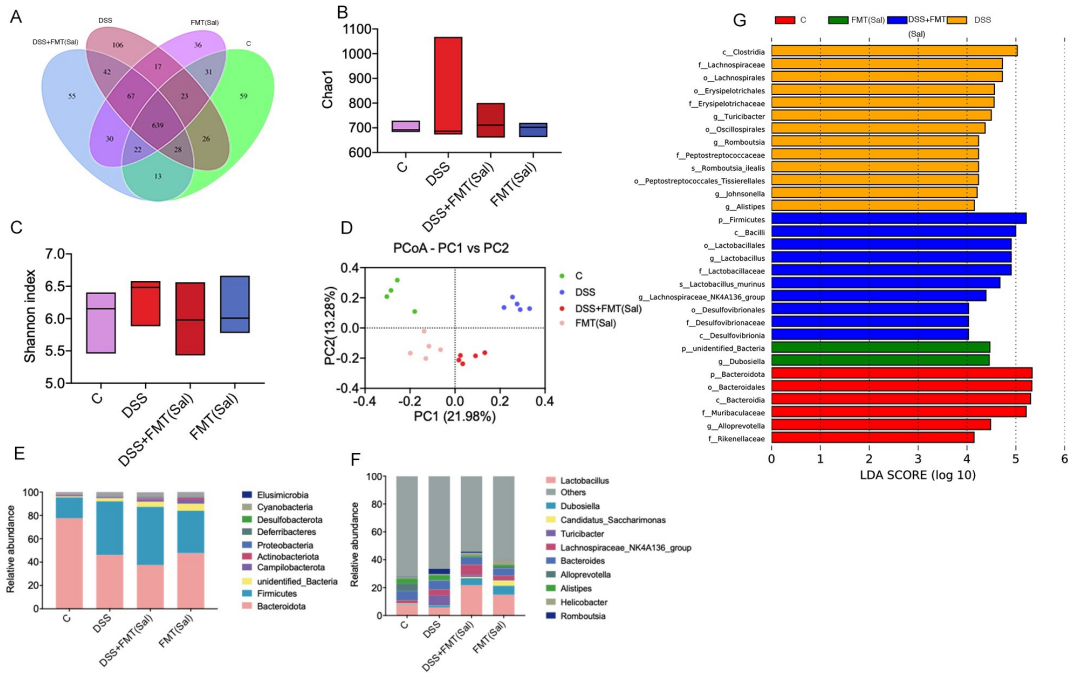

Supplement: d3fo01929b2.pdf [file d3fo01929b2.pdf]

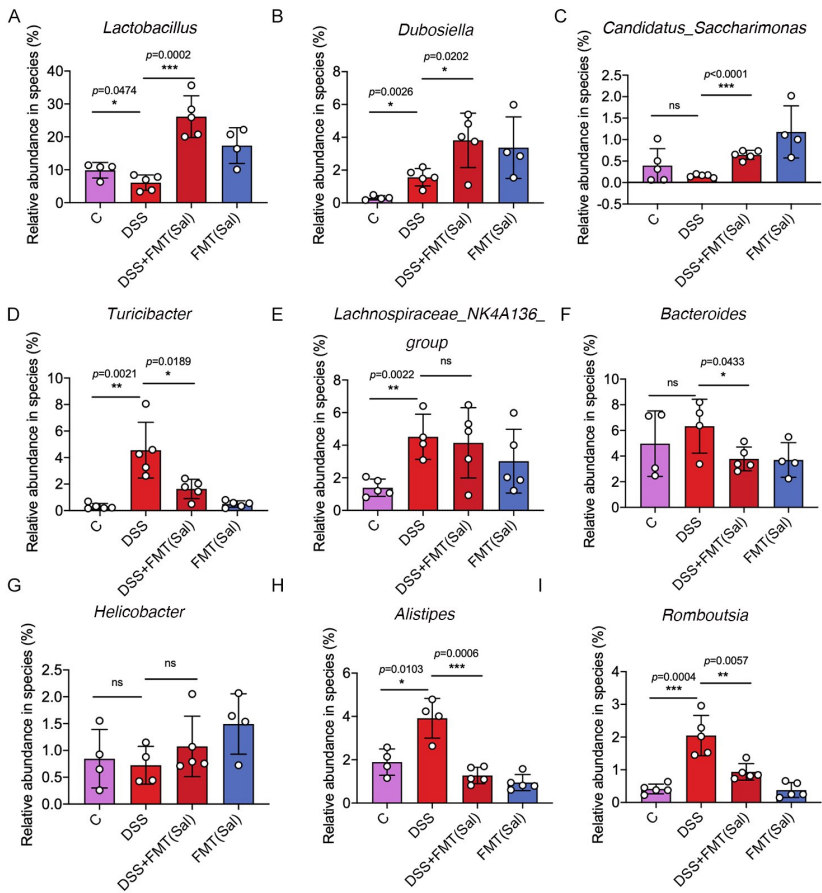

Supplement: d3fo01929b4.pdf [file d3fo01929b4.pdf]

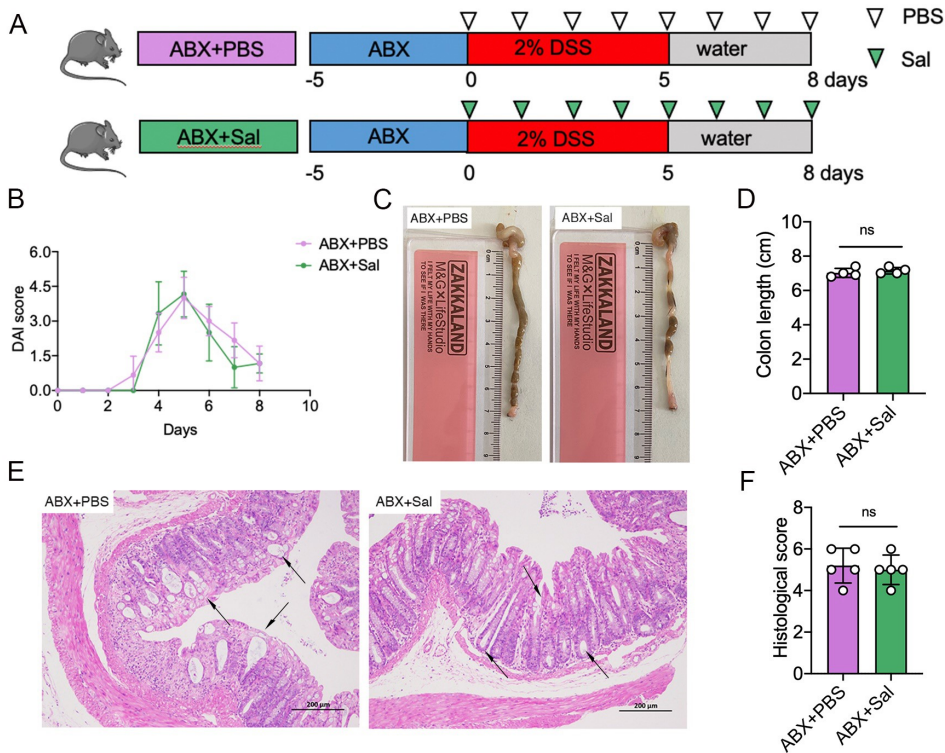

Supplement: d3fo01929b5.pdf [file d3fo01929b5.pdf]
